# Supplementary material
Source: PubMed Central journal article supplement (PMC9187775)

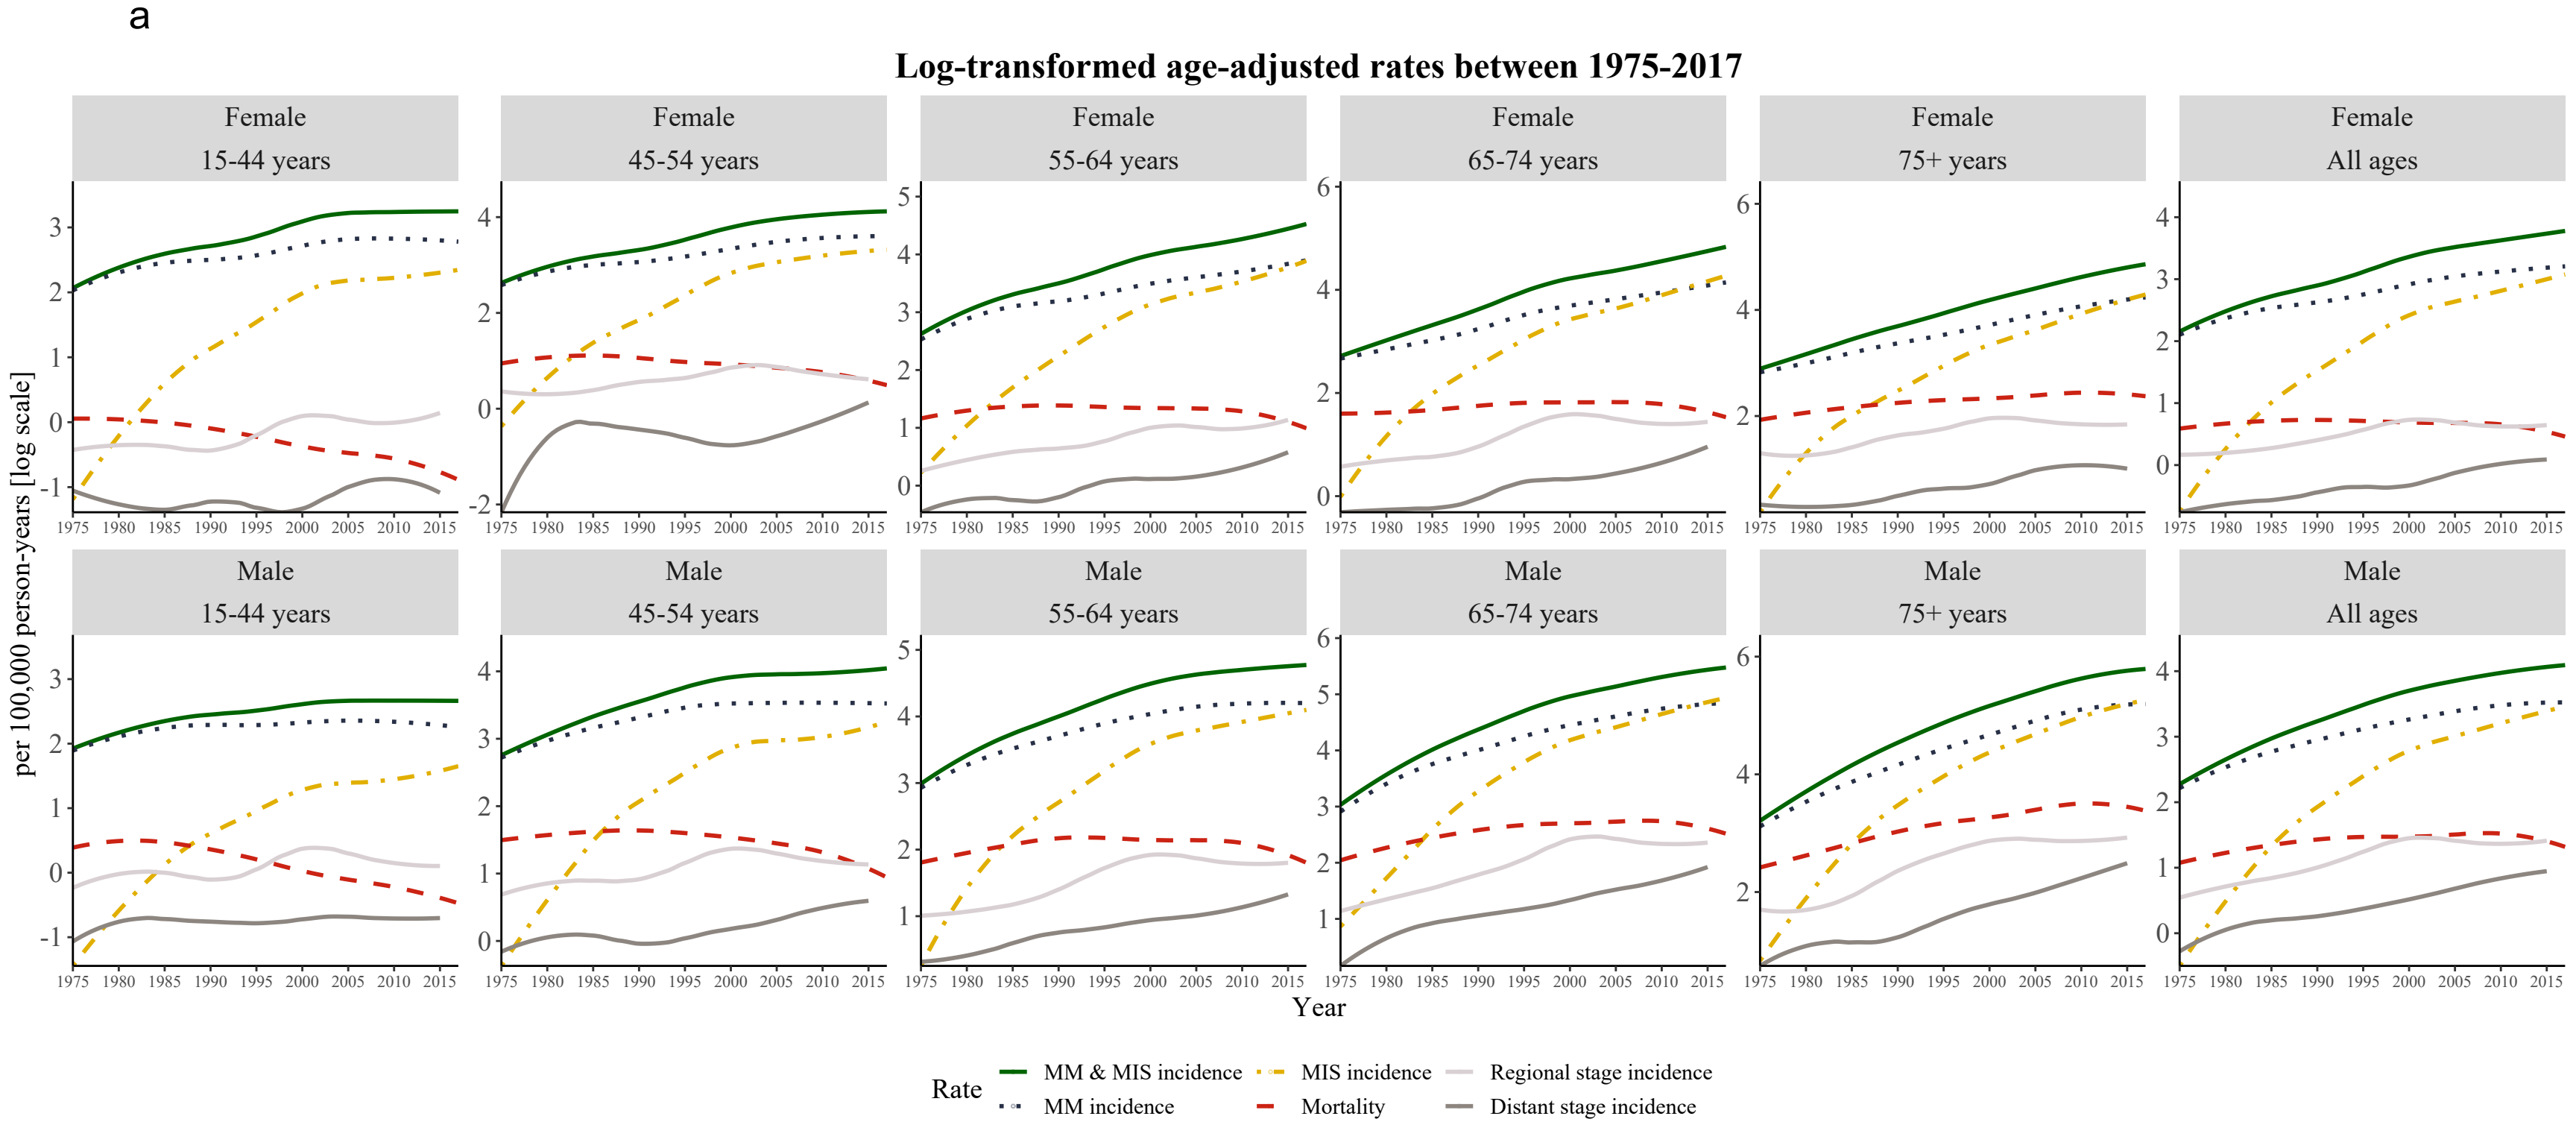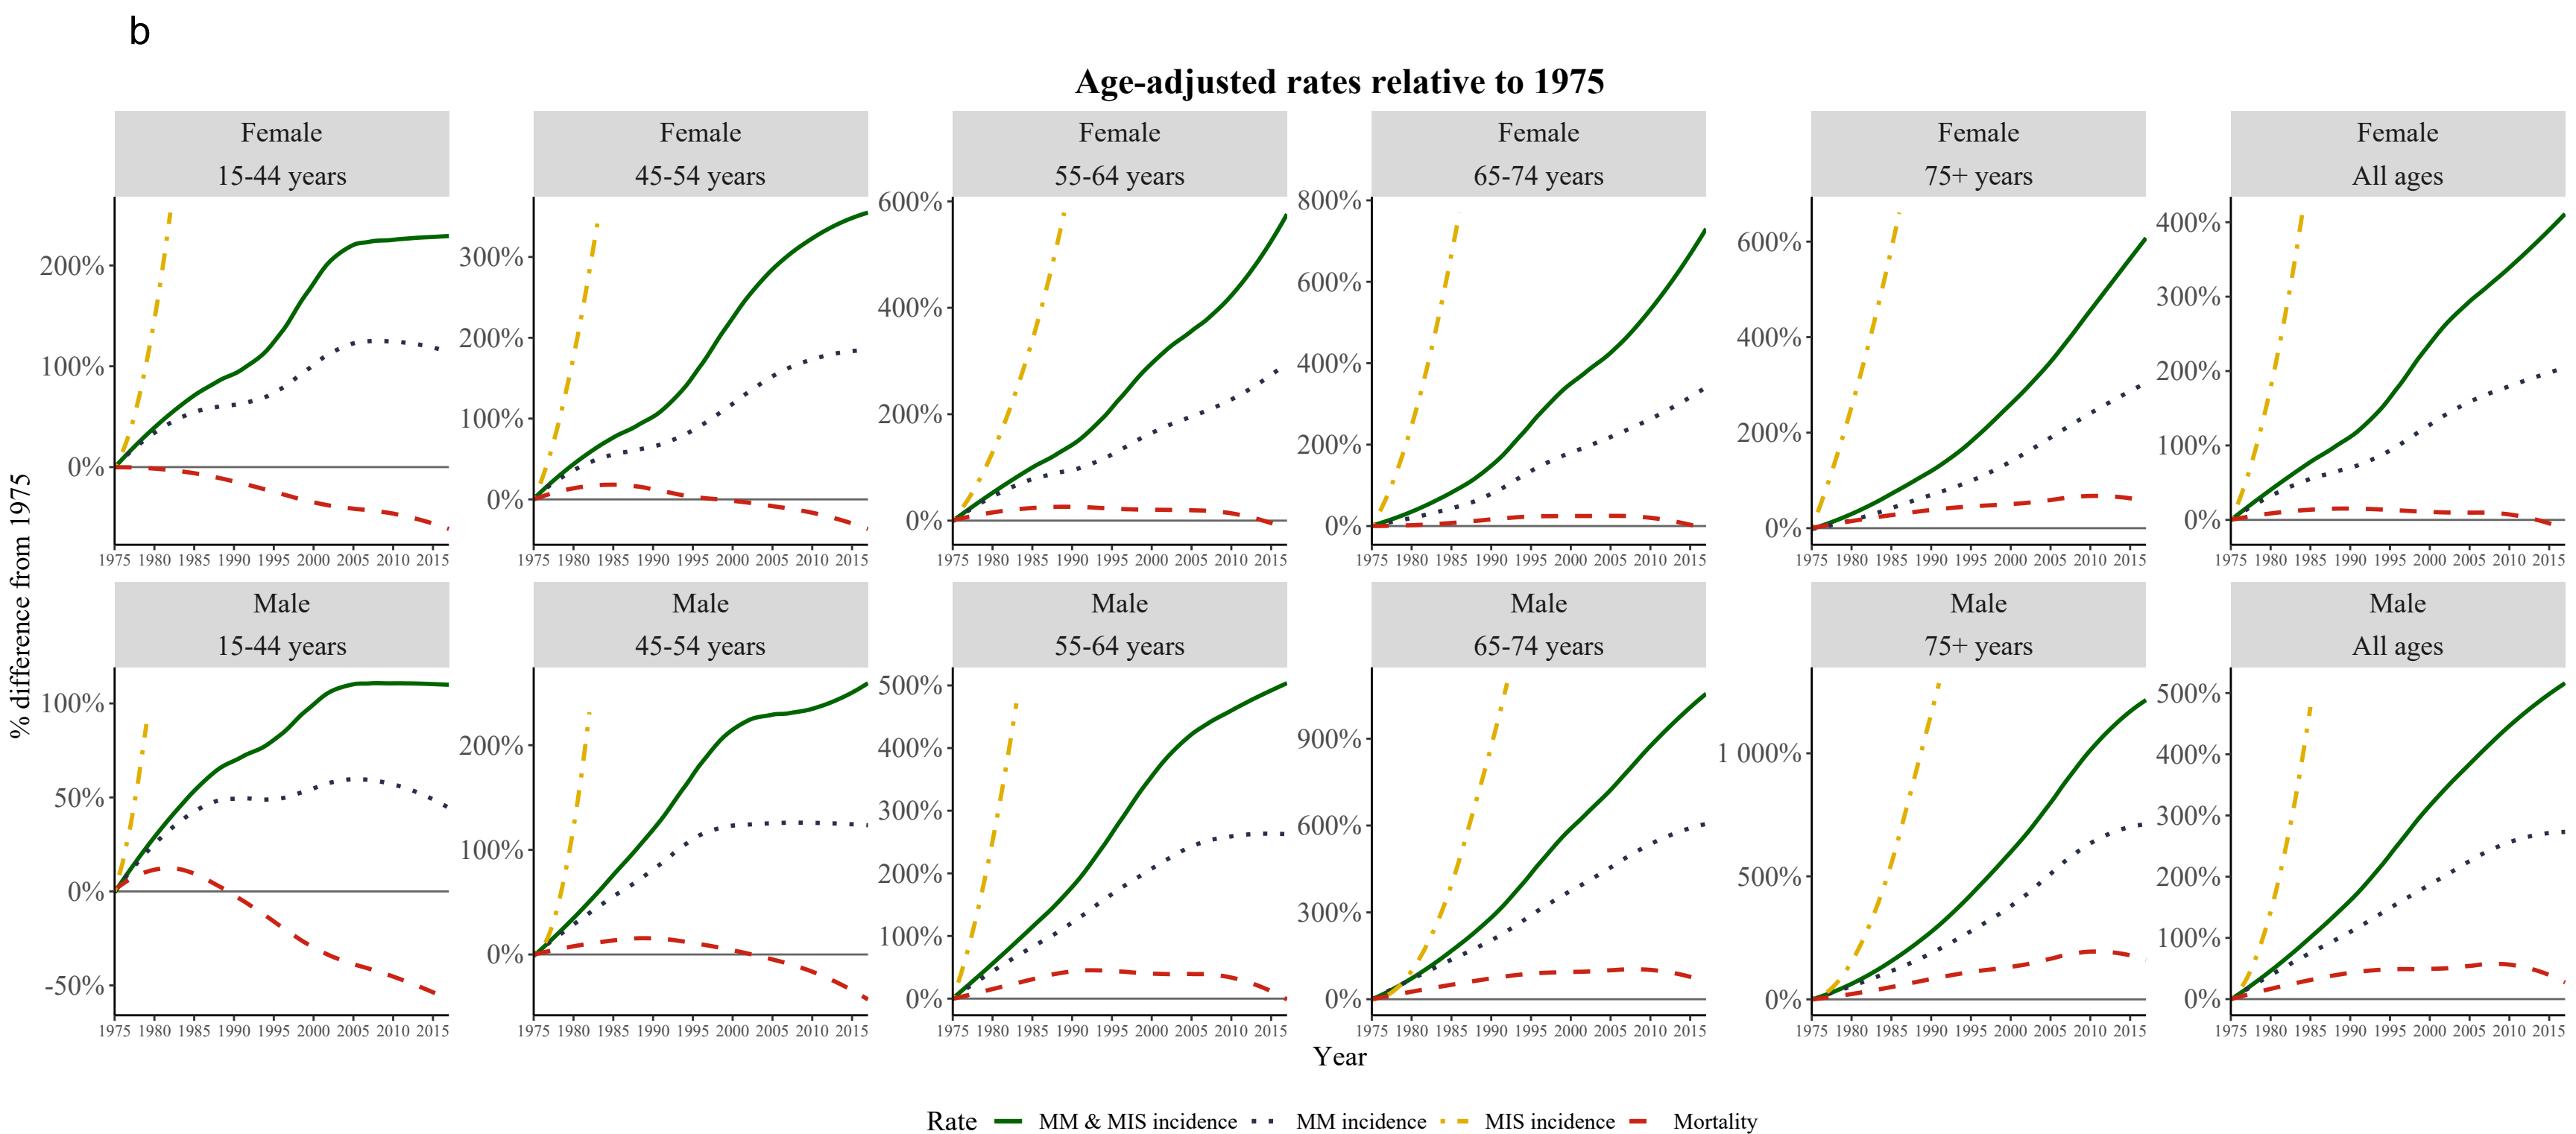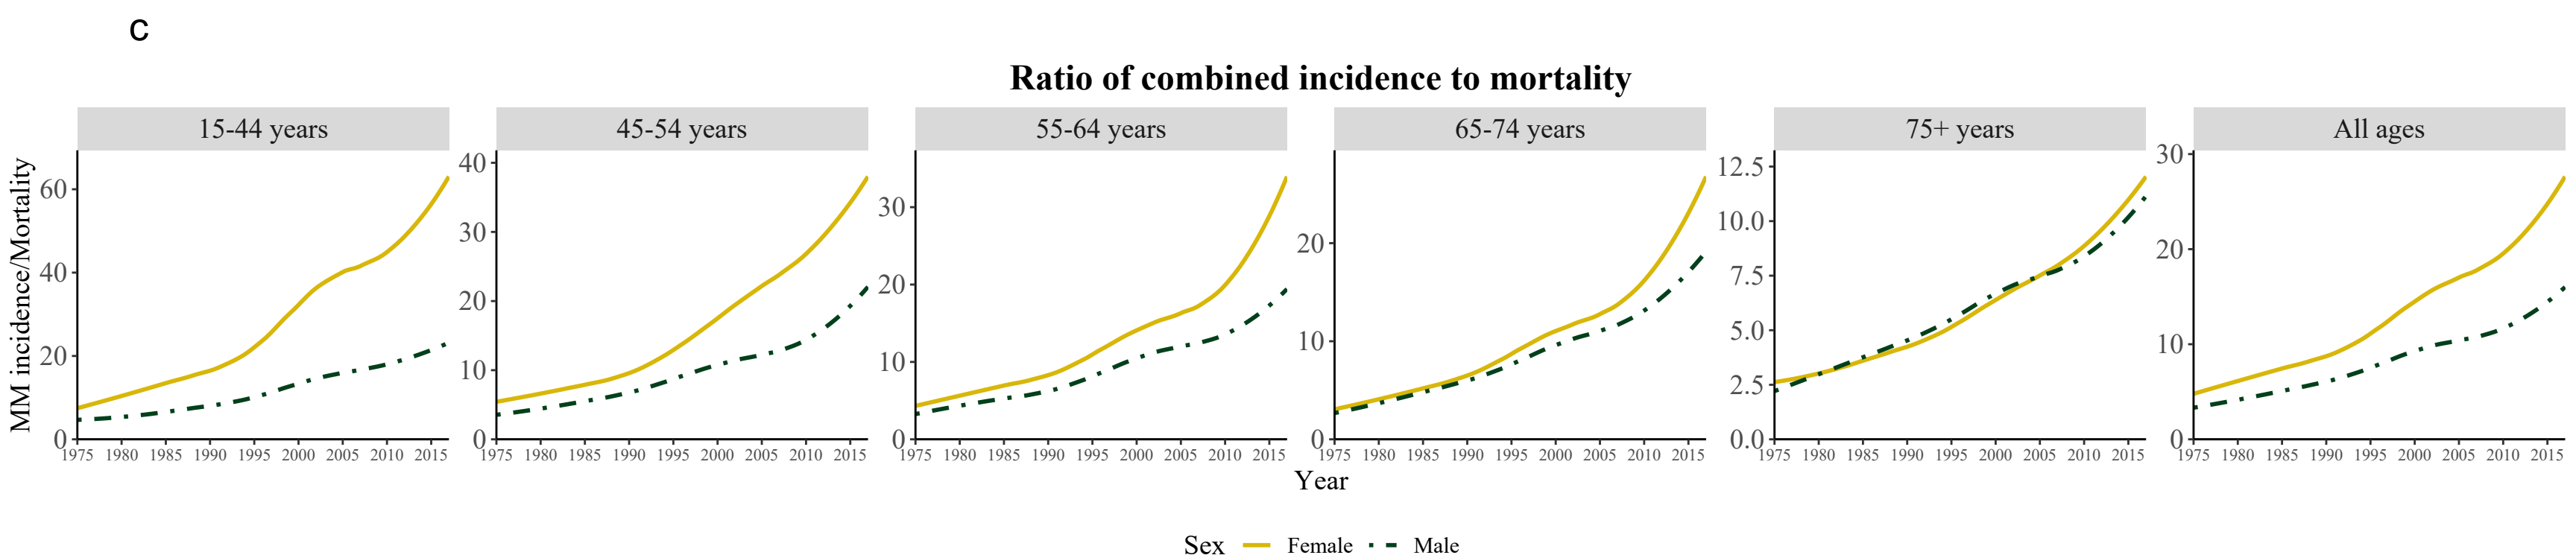

Supplement: NIHMS1763713-supplement-1.pdf [file NIHMS1763713-supplement-1.pdf]

a

Melanoma Thickness Trends 1988-2017

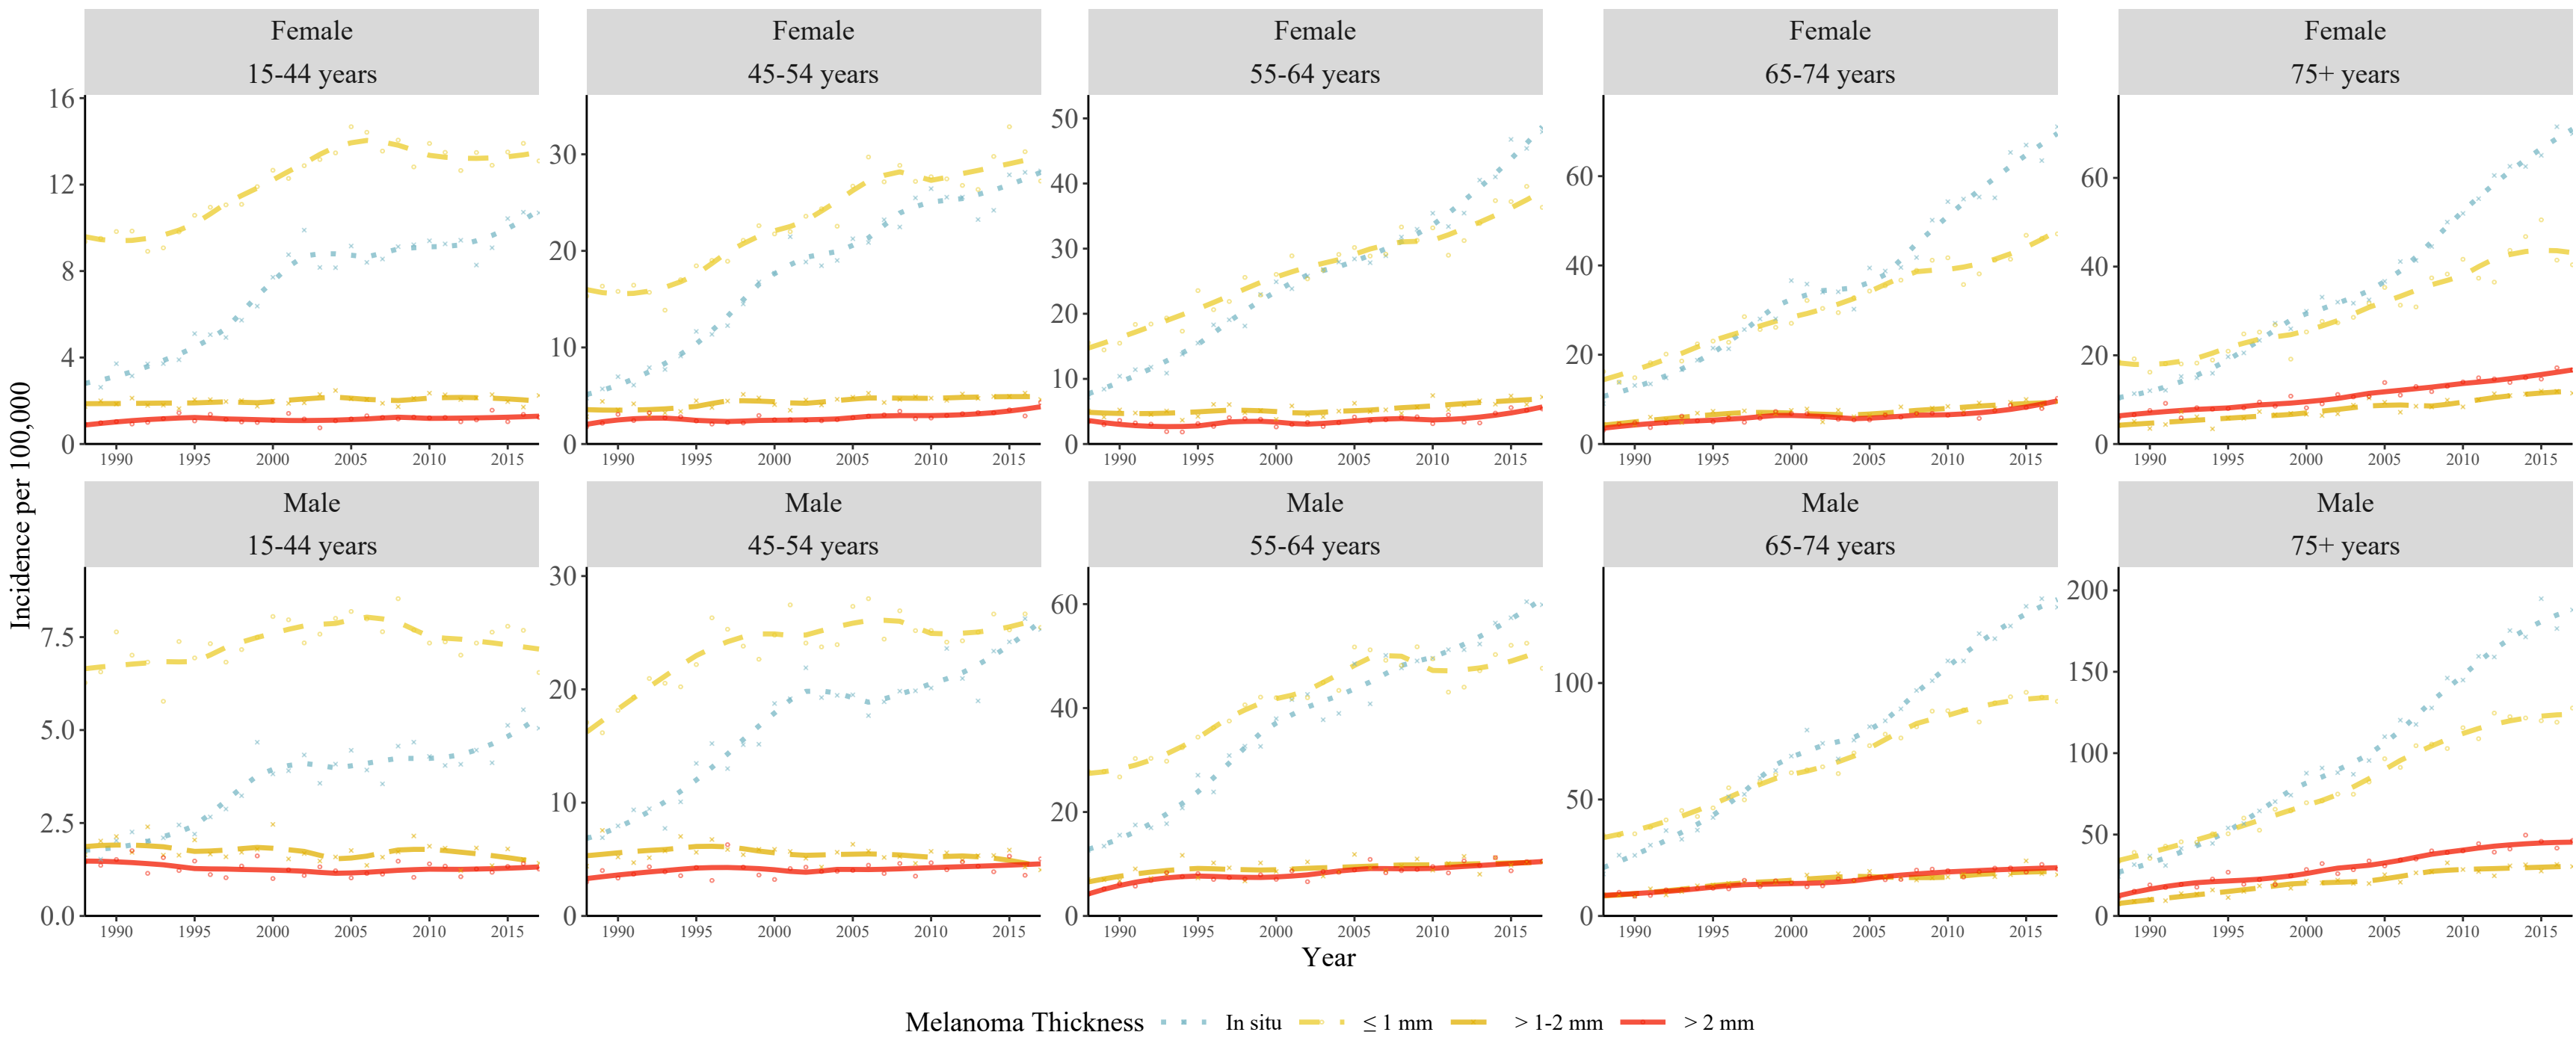

b

Melanoma Thickness Trends 1988-2017

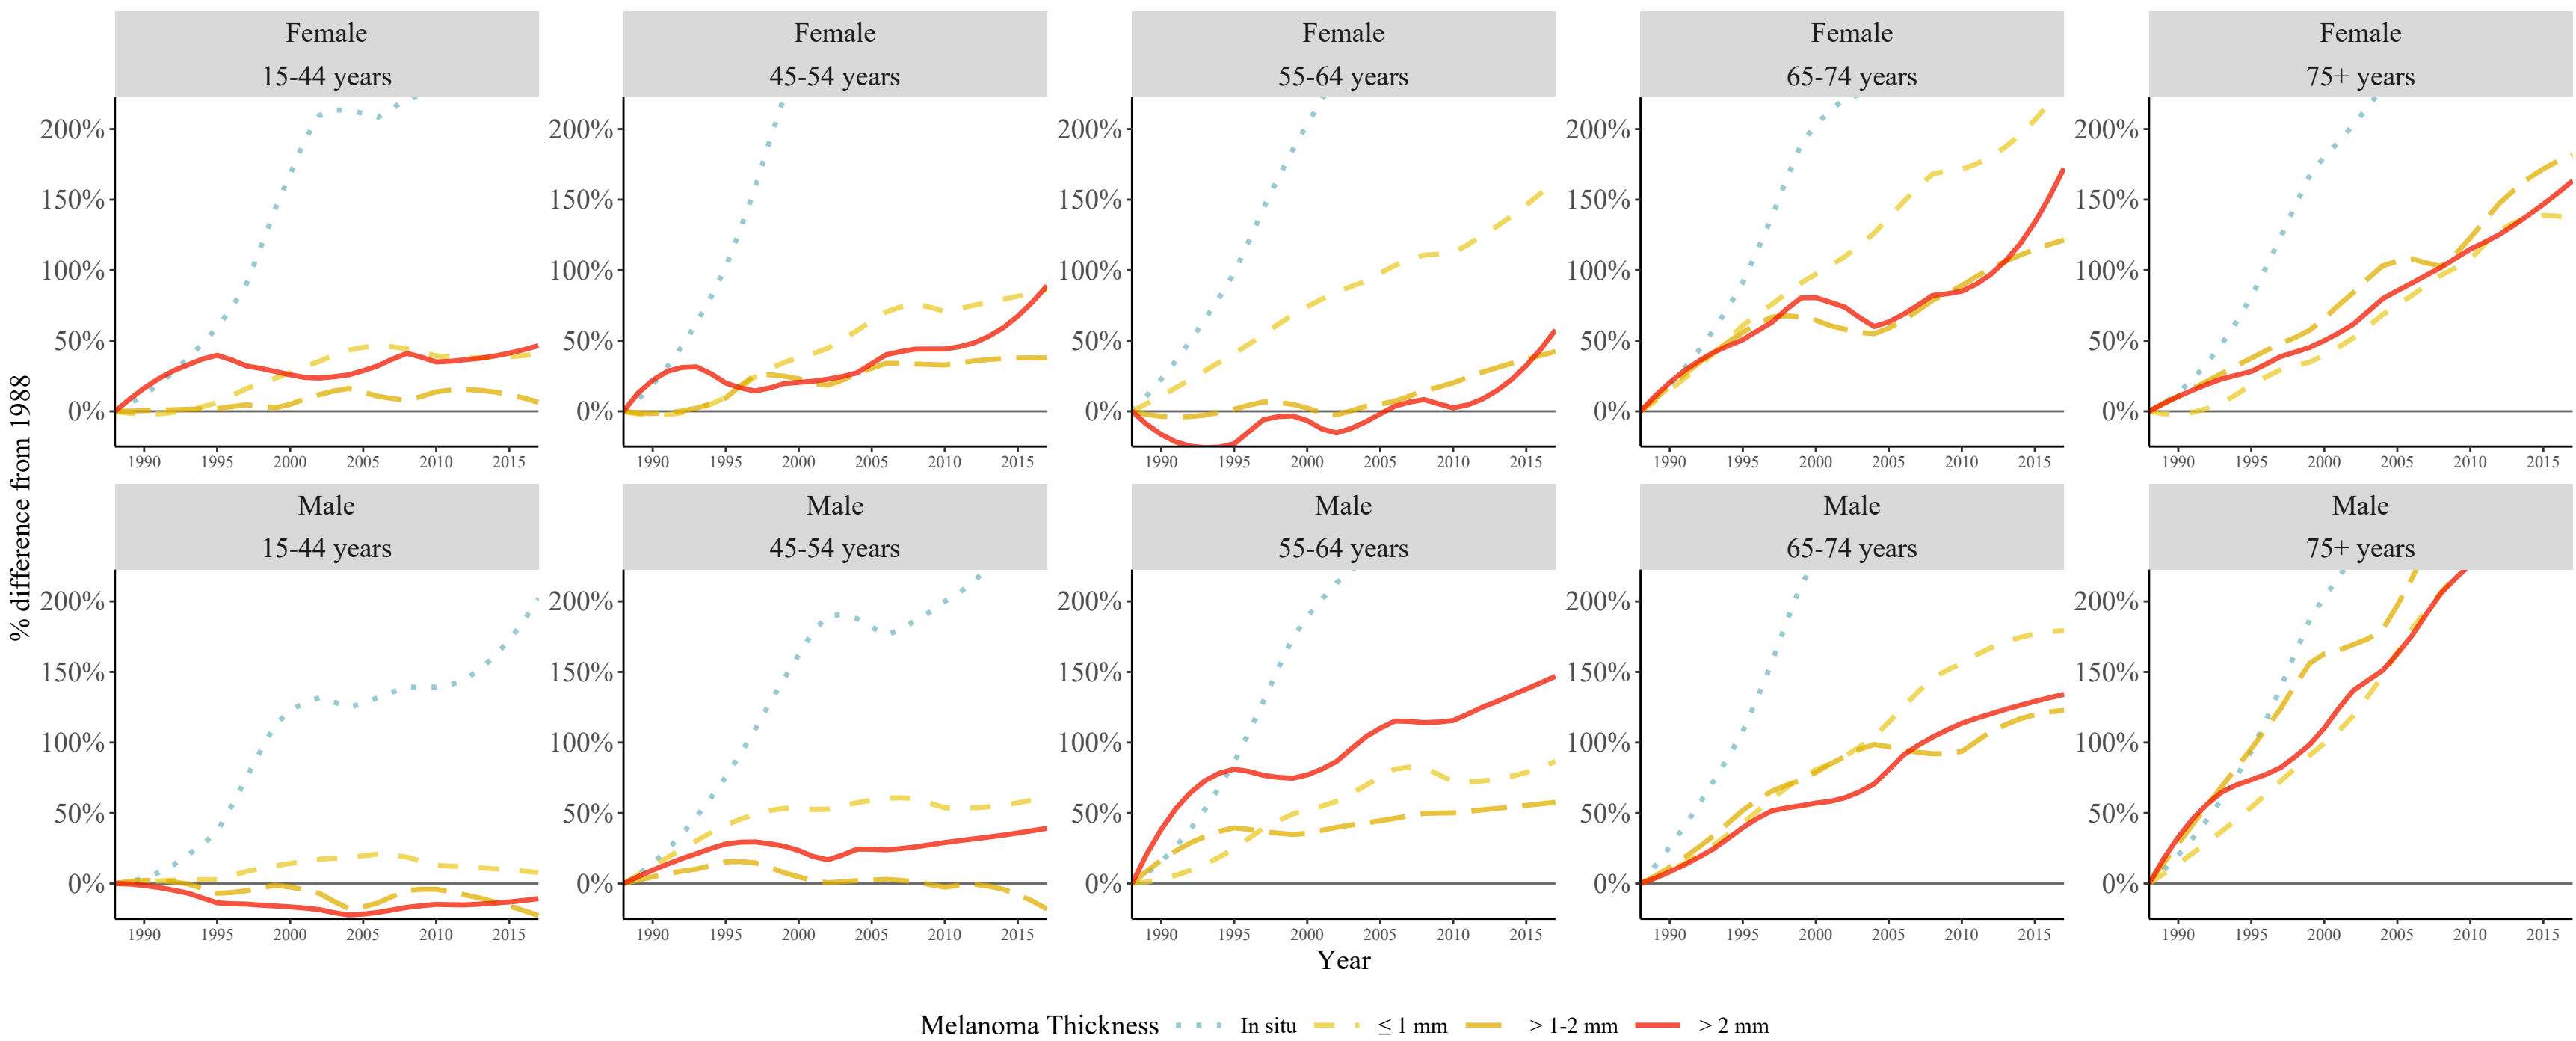

Supplement: NIHMS1763713-supplement-2.pdf [file NIHMS1763713-supplement-2.pdf]

# Stratified incidence and mortality trends by birth cohort

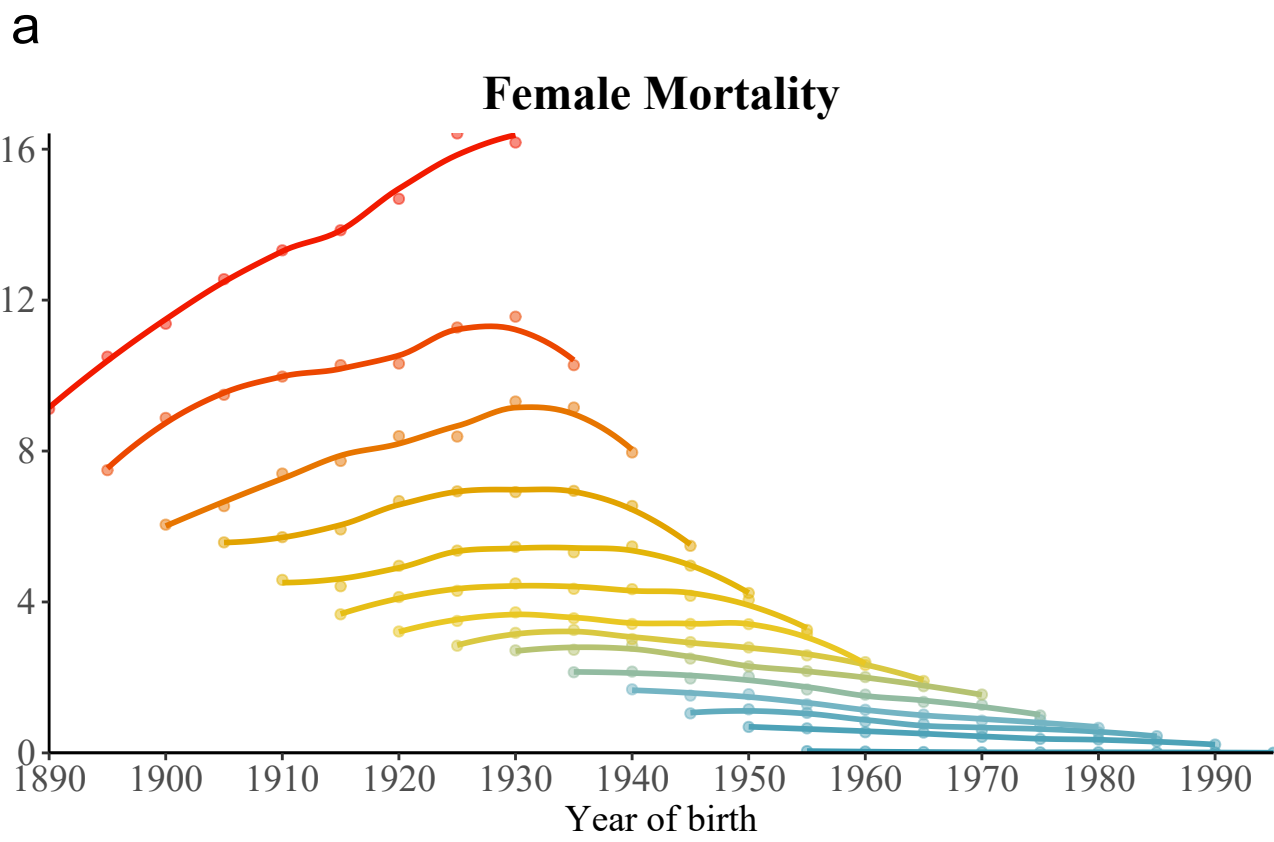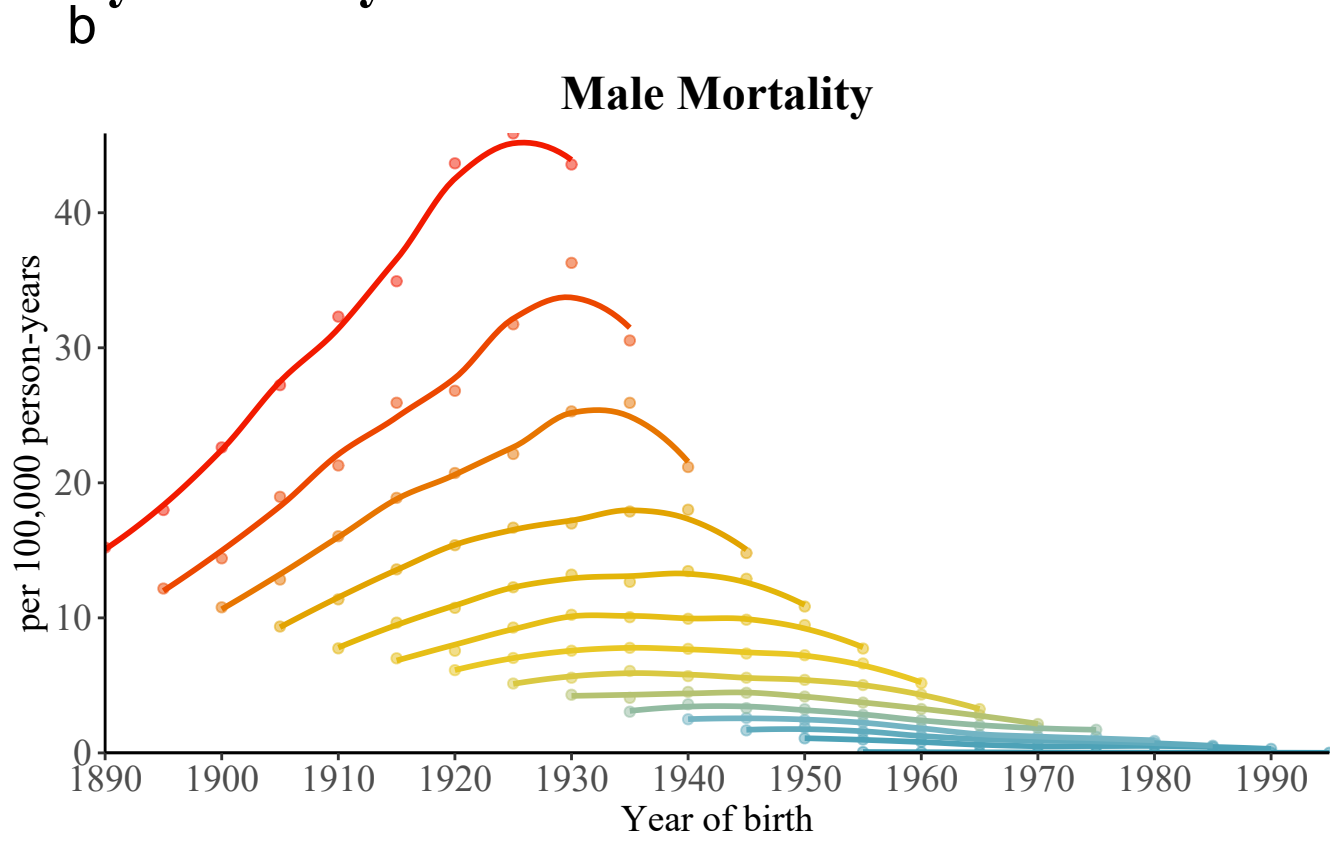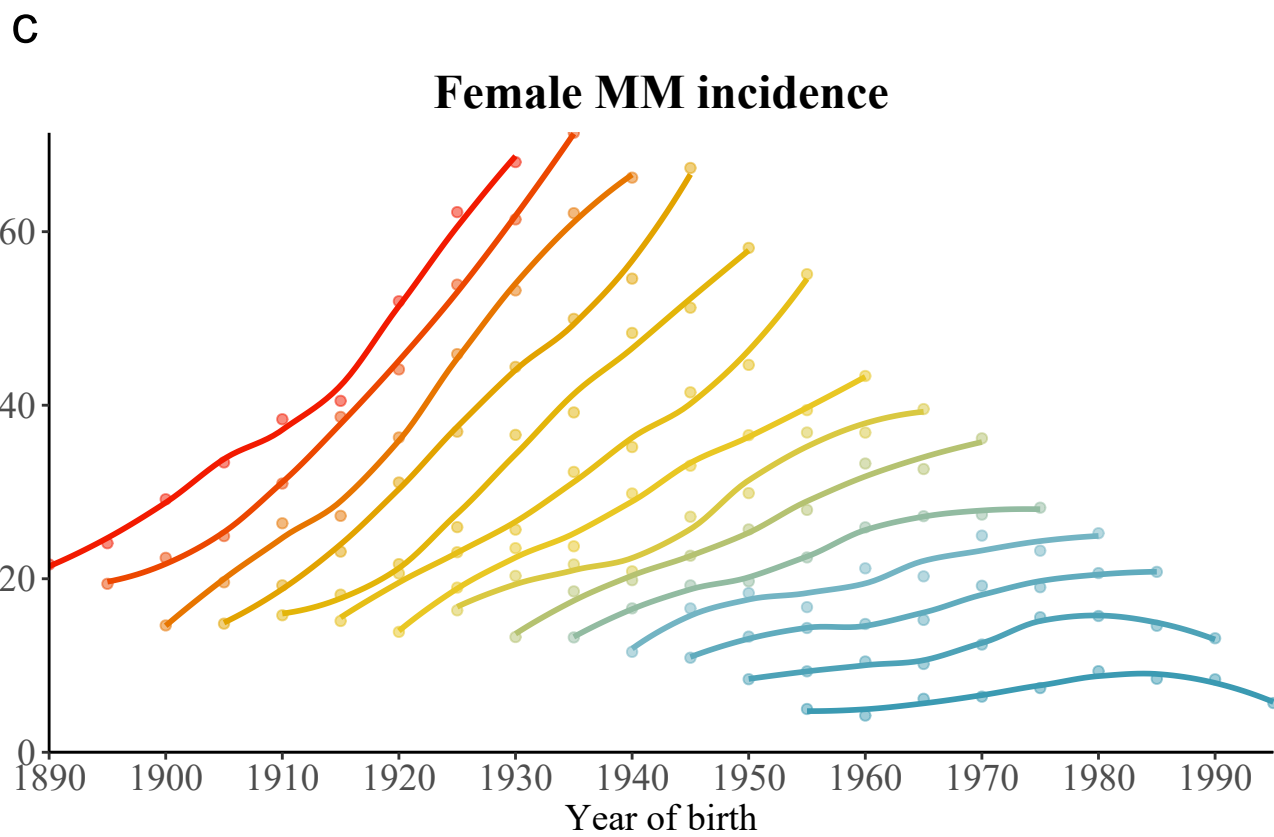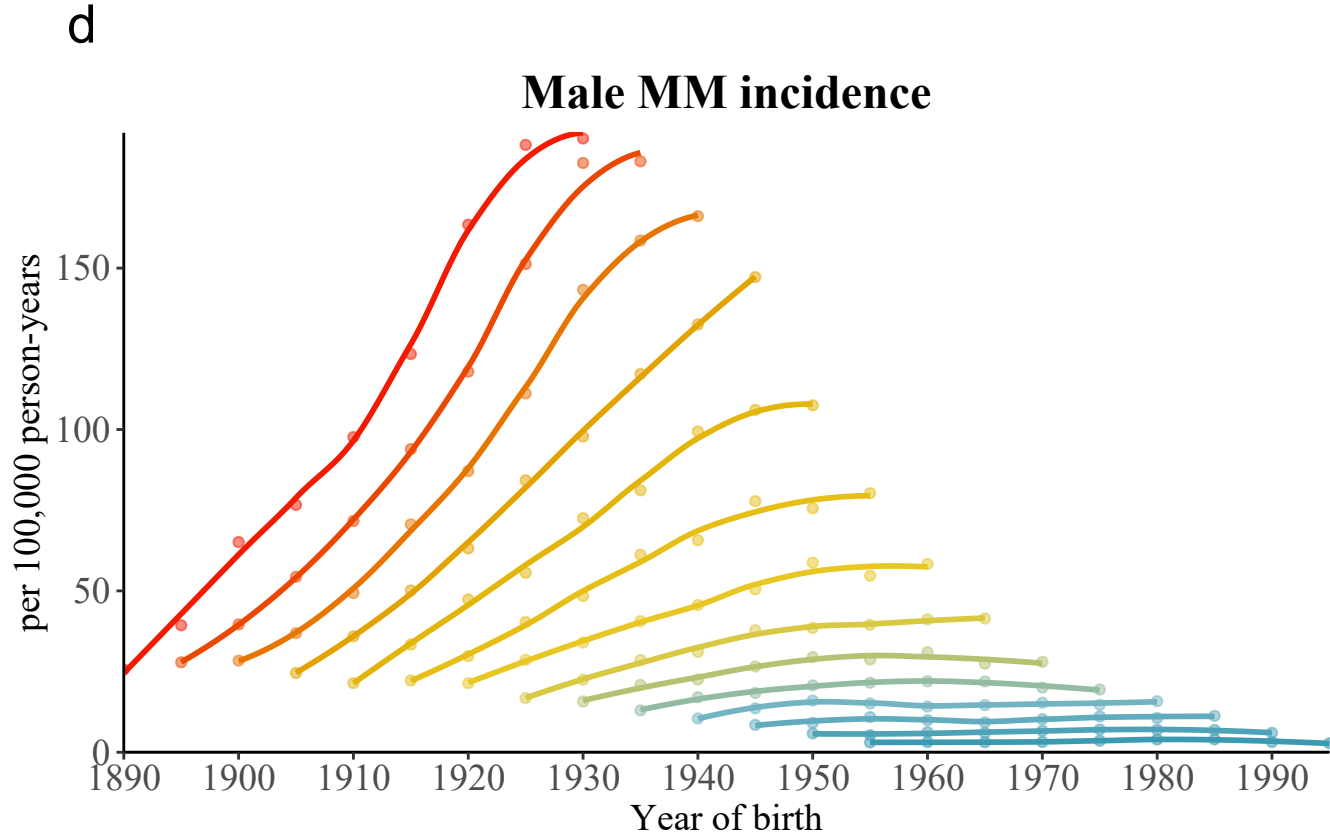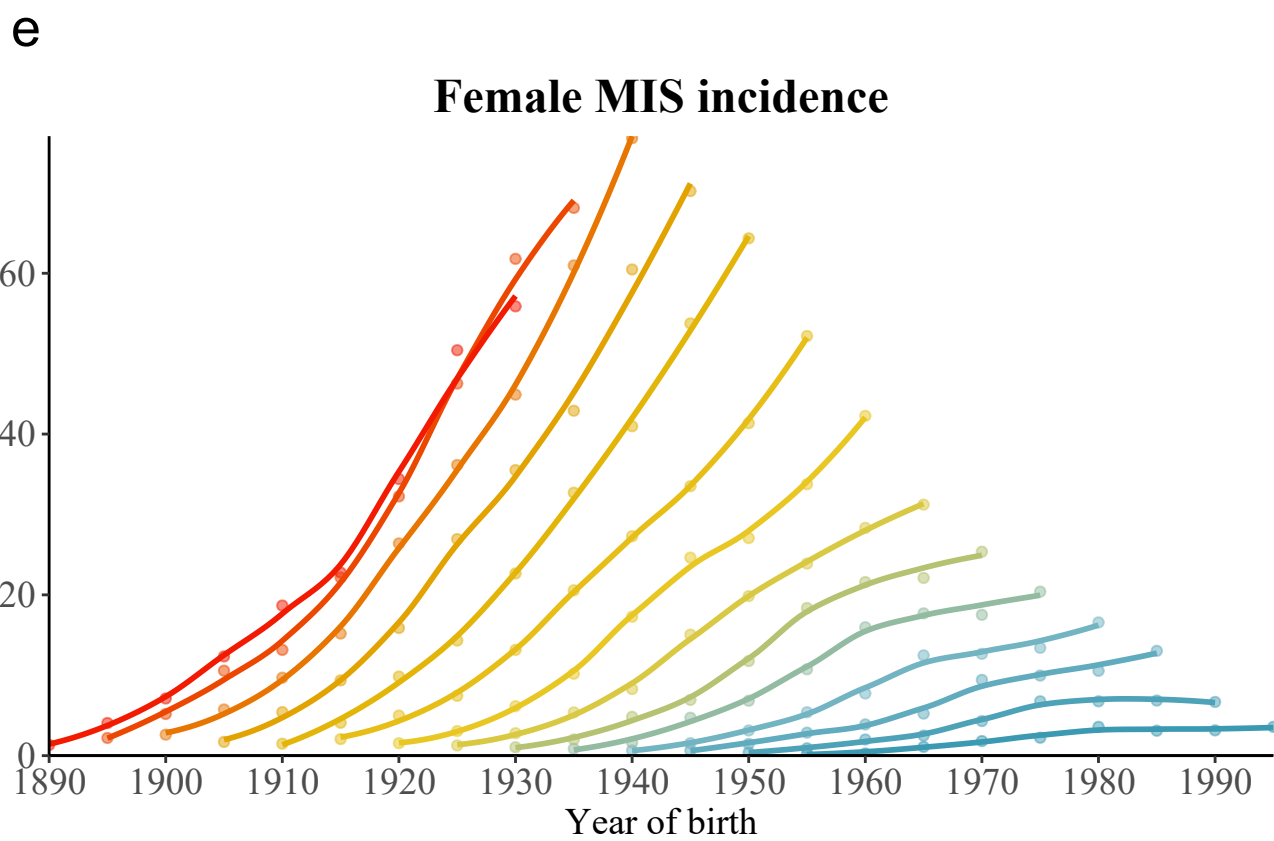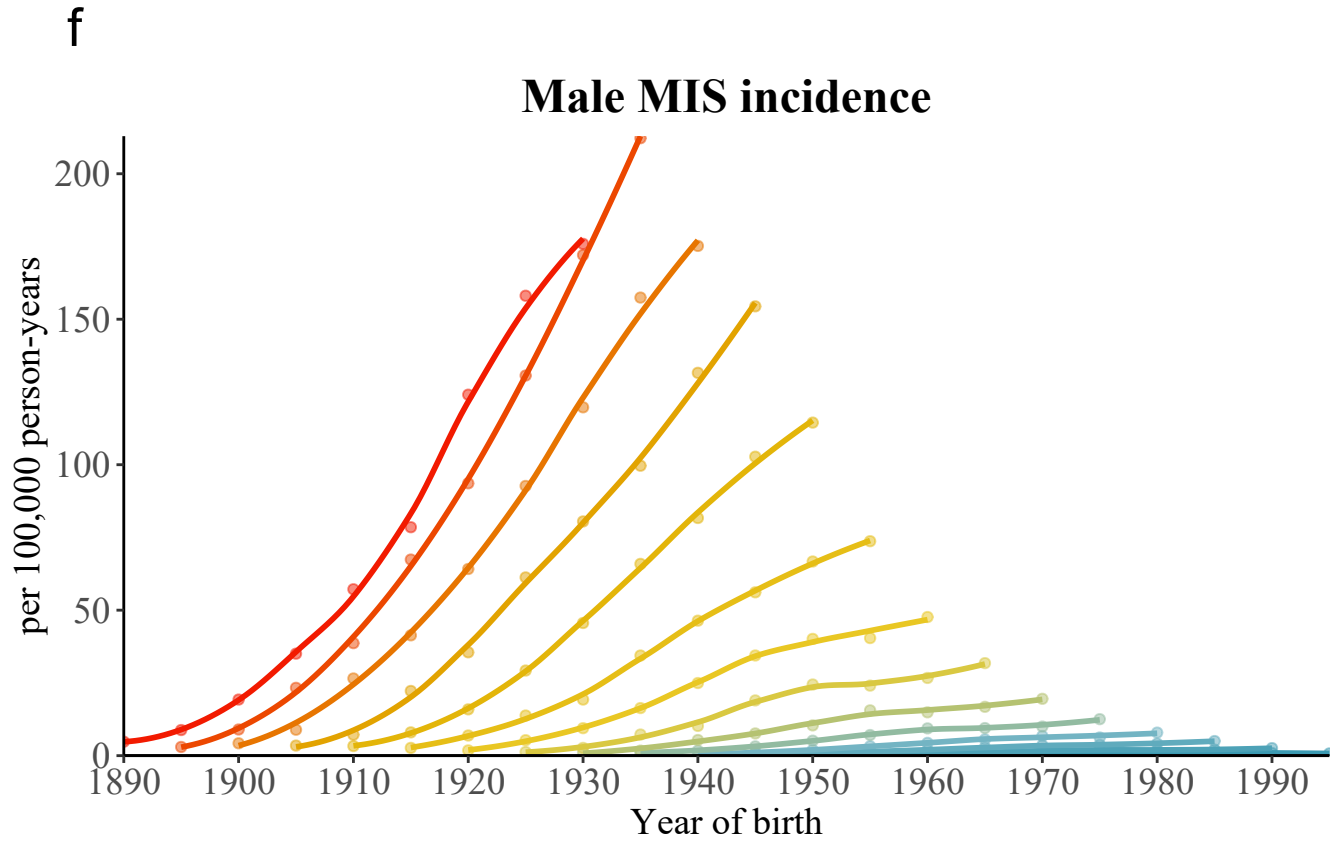

Age — 22 — 27 — 32 — 37 — 42 — 47 — 52 — 57 — 62 — 67 — 72 — 77 — 82 — 87

Supplement: NIHMS1763713-supplement-3.pdf [file NIHMS1763713-supplement-3.pdf]
